# Supplementary material for: A new system to study directional volatile-mediated interactions reveals the ability of fungi to specifically react to other fungal volatiles
Source: Frontiers journal article supplement (doi:10.3389/fevo.2023.1128514), 2023-04-06
Supplement: Table_1.XLSX [file Table_1.XLSX]

## Sheet: B. cinerea unexposed
row m/z	RI	mean area	compound
48.9837	701.667	3.86138e+07
91.0566	751.333	2.65533e+07
48.9837	804.451	317601
56.062	804.536	5.31256e+06
43.0177	816.005	839295
48.9836	819.685	348510
45.0333	840.192	687757
48.9837	841.116	93319.9
59.049	842	209511	2-Propanol, 1-propoxy-
45.028	842.434	45072.9
89.0596	842.588	96557.3
91.0563	857	2.11089e+07	Ethylbenzene
91.055	865.874	4.0121e+07
106.079	865.936	1.15289e+07
104.062	890.825	56273.2
91.0555	892.571	2.12597e+07
70.0778	904.954	129269
57.0699	909.632	547971
93.0674	932.314	145159
57.0698	944.644	930092
83.049	959.397	44757.9
105.033	960	336560	Benzaldehyde
81.0334	992.25	350122
57.0698	999.952	987293
281.053	1004	1.40425e+07	Cyclotetrasiloxane, octamethyl-
67.0542	1027	758341	Cyclohexene, 1-methyl-4-(1-methylethenyl)-, (S)-
57.0699	1031.25	4.6892e+06
57.0699	1058.45	202567
121.065	1086.17	188890
57.0698	1086.25	169024
56.0619	1104.87	146802
57.0698	1105.46	362532
57.0698	1112.16	301933
57.0698	1115.22	545459
57.0699	1117	812312	Undecane, 2,6-dimethyl
67.0541	1132.85	100413
78.0459	1150.6	83397.3
57.07	1153.37	66510.8
57.0699	1155.73	553620
71.0848	1156.5	40676.5
73.053	1160	6.50783e+06	Cyclopentasiloxane, decamethyl-
57.07	1170.53	333359
95.0858	1178	3.95359e+06	2-Methylisoborneol
55.0541	1191.49	193701
57.0698	1192.45	59400.9
57.0699	1199.23	541739
57.0699	1199.45	236716
55.0541	1206	76099.3	Decanal
55.0541	1230.67	1.02489e+06
57.0697	1233.85	30363.3
91.0558	1239	2.07981e+07	6,7-Dimethyl-1,2,3,5,8,8a-hexahydronaphthalene
118.077	1257.58	170654
105.07	1262.63	982173
105.07	1270	5.02727e+06	Benzene, 1-methyl-4-(3-methyl-3-butenyl)-
57.0699	1299.19	143082
71.0496	1306.65	70202.3
43.0542	1328.59	23638.8
73.0471	1331.53	1.21415e+06
71.0494	1351.07	7.18805e+06
145.101	1352.22	9.4421e+06
71.0491	1371	1.43056e+07	Propanoic acid, 2-methyl-, 3-hydroxy-2,2,4-trimethylpentyl ester
43.0542	1375.28	76073.4
55.0541	1391.06	60997.6
57.0699	1398.62	331559
57.0699	1398.72	82507
133.102	1411.12	185177
145.102	1416.03	82756.6
121.065	1427.55	63433.8
91.0555	1440.74	16136.9
158.097	1443.18	261385
118.077	1445.98	65200
118.077	1454.02	14400
118.077	1455.54	66049.4
121.065	1459.14	24068.5
177.128	1466.05	157626
165.092	1471.33	115670
118.077	1473.71	524662
107.049	1492.23	218349
57.0698	1498.34	197829
73.0471	1502.14	269394
191.144	1511.97	474635
72.0568	1521.33	188108
72.0558	1523.03	110514
91.0571	1528	202114	(+)-2-Carene, 2-isopropenyl-
119.049	1538.31	96141.6
91.0565	1582	753446	Bicyclo[6.3.0]undeca-1(8),9-diene, 11,11-dimethyl-
71.0493	1597.04	215752
71.049	1597.15	48626.5
57.0698	1598.26	618771
57.0699	1598.47	120111
97.0282	1625.47	43788.4
71.0851	1662.96	189381
73.0472	1671.85	128842
91.0588	1685.62	27981.2
57.0698	1697.72	503961
105.07	1701.11	85204.7
105.033	1709.94	17962.4
82.0776	1713.9	10031
105.071	1779.37	195095
191.144	1781.16	18322.8
57.0699	1797.61	918351
105.071	1802.8	76961.9
120.021	1805.7	49563.4
178.135	1821.26	44416.1
61.0282	1825.12	150457
73.0472	1832.14	121745
57.0698	1851.13	19786.3
149.024	1867.79	776214
57.0699	1897.64	906270
236.129	1900.36	8543.02
74.0364	1925.04	149250
149.024	1962.21	495310
149.024	1964.8	55141.9
57.07	1997.65	1.17922e+06
57.07	2097.38	834469
74.0364	2126.41	87256.7
57.07	2197.61	509159

## Sheet: F. oxysporum unexposed
row m/z	RI	mean area	compound
48.9833	702	6.33195e+07
56.0617	803.321	181132
59.0488	805.033	58970.3
48.9832	805.46	577853
165.869	807.087	59162
45.0331	807.811	1.58421e+06
58.0407	836.483	301404
48.9834	837.367	99806.9
45.033	838.583	1.32703e+06
59.0487	838.733	468543
91.0541	864.601	1.99379e+07
56.0614	866.741	314041
104.061	889.319	30417.4
91.0542	891	6.54834e+06	Benzene, 1,3-dimethyl-
70.0771	903.958	30186
55.0535	942.845	21077.2
57.0695	943.537	1.11356e+06
59.0489	959.521	370896
105.033	959.95	481988
106.044	978.384	544130
57.033	980.266	207902
57.033	988	27451.1	3-Octanone
81.033	990.7	176793
93.0697	991.171	7892.97
57.0694	998.561	110868
43.0175	1000.91	85243.6
56.0617	1003.19	77251.8
67.0539	1026.12	37804
57.0695	1029.94	1.86595e+06
57.0695	1098.25	318378
56.0617	1103.47	173662
121.065	1111	1.59773e+07	Benzene, 1-ethyl-4-methoxy-
73.0516	1158.85	88054.6
57.0696	1197.97	189192
55.0539	1205.32	14209.8
58.041	1295.2	17136
57.0695	1297.48	747700
111.043	1303.38	19557.4
105.069	1305.67	14484.9
91.0538	1305.9	14895
43.0175	1322.8	10361.2
151.075	1324.27	134042
93.0697	1334.9	21201.1
163.146	1347.43	26926.5
133.101	1350	1.56084e+06	Tricyclo[7.2.0.0(3,8)]undec-4-ene, 4,8,11,11-tetramethyl-
161.132	1354.86	659851
105.069	1359.93	432655
109.1	1363.07	158493
133.101	1370.14	3.76216e+06
133.101	1372.99	47884.1
92.0611	1373.74	38507.9
57.0695	1373.97	23526.9
133.101	1375.96	213260
162.138	1382.47	554612
93.0696	1389.12	614809
133.101	1389.16	775357
133.101	1390	1.38519e+06	1,5,6,7-Tetramethylbicyclo[3.2.0]hepta-2,6-diene
57.0696	1397.18	272874
133.101	1406.9	404243
119.086	1408.97	1.66595e+07
133.101	1411	3.63946e+06	4a,8-Dimethyl-2-(prop-1-en-2-yl)-1,2,3,4,4a,5,6,7-octahydronaphthalene
91.054	1416.67	78322.4
161.132	1417.35	3.37176e+06
107.085	1435.15	2.28467e+06
93.0696	1435.47	3.18269e+07
133.101	1439.2	2.77283e+06
119.087	1458.46	103438
119.086	1461.86	1.11726e+07
93.0696	1466	2.68811e+06	Bicyclo[7.2.0]undec-4-ene, 4,11,11-trimethyl-8-methylene-,[1R-(1R*,4Z,9S*)]-
165.086	1469.79	81419.1
161.132	1478.23	179998
122.107	1479.91	251409
132.093	1481	472797	Benzene, 1-(1,5-dimethyl-4-hexenyl)-4-methyl-
93.0697	1492.64	57356.3
119.087	1493	235364	1H-3a,7-Methanoazulene, 2,3,4,7,8,8a-hexahydro-3,6,8,8-tetramethyl-, [3R-(3α,3aβ,7β,8aα)]-
57.0695	1496.32	129614
73.0466	1500.21	52240.9
132.093	1503.21	27684.7
107.085	1505.44	671557
121.065	1507.47	1.48769e+07
121.101	1511	1.42648e+06	(1R,5S)-1,8-Dimethyl-4-(propan-2-ylidene)spiro[4.5]dec-7-ene
93.0696	1520.38	526793
149.132	1529.04	1.39236e+06
159.117	1531.69	38650.6
205.158	1532	122108
69.0695	1559	927286	1H-Cycloprop[e]azulen-4-ol, decahydro-1,1,4,7-tetramethyl-, [1aR-(1aα,4β,4aβ,7α,7aβ,7bα)]-
69.0696	1561.76	403854
57.0695	1596.67	141929
95.0851	1599	16857.3	(3R,3aS,6S,7R)-3,6,8,8-Tetramethyloctahydro-1H-3a,7-methanoazulen-6-ol
93.0697	1612.5	2.8108e+07
107.085	1625.19	734355
119.086	1629	4.16403e+07	β-Acorenol
71.0854	1661.25	46697.8
95.0851	1663.32	75805.5
107.085	1665.67	14584
93.0697	1686.83	18966.8
57.0694	1695.76	69651.9
161.132	1702	142646	Guaiol
219.138	1761.6	393240
57.0695	1795.34	175170
105.069	1850.52	653941
123.116	1853.91	16015.8
134.108	1866.85	35741.4
149.023	1866.97	141751
161.132	1881.06	403047
57.0694	1895.24	78363.9
229.195	1903.23	58289.3
119.087	1924.04	989768
159.116	1924.05	31370.3
119.087	1928.98	153138
91.054	1942.82	18140.3
161.132	1942.95	742754
149.023	1961.17	70740.1
71.0854	1961.79	9193.49
121.101	1964.9	1.54677e+06
71.0854	1995.23	18025
57.0694	1995.23	66399.5
107.085	1999.84	12566.1
121.101	1999.9	521675
286.229	2090	129755	(4aR,4bR,10aR)-7-Isopropyl-1,1,4a-trimethyl-3,4,4a,4b,5,6,10,10a-octahydrophenanthren-2(1H)-one
148.088	2120.49	79860
187.111	2157.69	14539.8
135.08	2189.11	2.17345e+06

## Sheet: B. cinerea exposed to T. simmon
row m/z	RI	mean area	compound
48.9837	702	8.91843e+06
83.9518	700.222	5.25515e+06
48.9833	714.333	5.11459e+07
56.0615	803.64	350155
59.0485	805	289383	1,8-Nonanediol, 8-methyl-
48.9833	807.406	777751
45.033	807.748	1.22581e+06
59.0485	839.329	695254
106.079	863.745	8.3206e+06
91.0554	864.145	1.88942e+07
91.0553	890.919	1.81408e+07	Benzene, 1,3-dimethyl-
70.0773	903.432	56080.4
57.0693	907.902	777111
57.0693	943.53	727477
83.0483	957.722	28320.4
59.0487	959	344240	Propane, 1-ethoxy-
105.033	960	1.81937e+06	Benzaldehyde
94.0403	988	49926.9	3-Octanone
94.0403	989.123	27591.3
81.0327	990.968	972277
57.0692	998.616	135631
56.0615	1003.21	228046
67.0537	1027	260908	Cyclohexene, 1-methyl-4-(1-methylethenyl)-, (S)-
93.0685	1028.18	10785.9
57.0694	1029.55	3.97165e+06
57.0696	1032.74	36930.7
43.0172	1039.93	65631.5
57.0694	1056.8	83054.8
57.0694	1062.04	121148
57.0695	1063.19	162826
57.0695	1069.41	71184.8
71.0853	1073.14	29019.8
57.0696	1074.94	18795.6
135.091	1078.74	53251.9
70.0773	1081.04	18247.2
57.0694	1098.06	1.48799e+06
56.0615	1103.45	656935
91.0551	1112	649608	Phenylethyl Alcohol
123.08	1112.93	301203
79.0535	1138.16	322320
73.0464	1160	169458	Cyclopentasiloxane, decamethyl-
95.085	1178	2.104e+06	2-Methylisoborneol
133.1	1195.13	13608.5
57.0694	1197.87	738810
55.0536	1206	72657.4	Decanal
118.077	1227	739328	Naphthalene, 1,2,3,4-tetrahydro-1,4-dimethyl-
91.0553	1239	5.03641e+07	6,7-Dimethyl-1,2,3,5,8,8a-hexahydronaphthalene
105.072	1240.25	6.05807e+06
145.101	1245.48	4.81224e+06	Benzene, 1-(1-methylethenyl)-2-(1-methylethyl)-
105.071	1260.69	365502
105.071	1270	2.61101e+06	Benzene, 1-methyl-4-(3-methyl-3-butenyl)-
105.071	1275.06	65010.3
57.0694	1277.81	246196
57.0694	1297.24	1.42394e+06
123.062	1311.01	1.17082e+06
143.085	1314.16	19550.7
57.0694	1323.55	308391
57.0694	1332.95	217496
83.0848	1338.35	54960.7
68.0613	1341.7	8859.17
145.101	1350.04	1.31192e+07
57.0692	1361.31	181587
57.0692	1367.77	126312
71.0487	1371.02	59859	Propanoic acid, 2-methyl-, 3-hydroxy-2,2,4-trimethylpentyl ester
71.0853	1373.63	17683.6
57.0693	1373.72	149978
55.0534	1389.29	70275.6
93.0686	1389	270113	1,5-Cyclodecadiene, 1,5-dimethyl-8-(1-methylethenyl)-, [S-(Z,E)]-
57.0694	1396.8	1.52481e+06
119.085	1416	418777	Benzene, 1-methyl-4-(1-methylpropyl)-
147.116	1418	1.87422e+06	(-)-Aristolene
161.132	1418	534160	1H-3a,7-Methanoazulene, octahydro-3,8,8-trimethyl-6-methylene-, [3R-(3α,3aβ,7β,8aα)]-
119.085	1434	1.46259e+06	cis-α-Bergamotene
176.118	1438.18	23127.1
161.132	1442.18	17368.3
145.102	1452.58	10650.7
69.0698	1454.58	110014
57.0694	1459.94	77643.1
177.127	1463.93	37902.3
119.085	1474	863257	(1R,4R,5S)-1,8-Dimethyl-4-(prop-1-en-2-yl)spiro[4.5]dec-7-ene
118.076	1473.13	37009
145.101	1489.82	236354
189.163	1492.12	57759.4
57.0694	1492.16	194388
93.0687	1492.28	53287.4
57.0694	1496.36	384444
105.071	1497	689770	α-Muurolene
73.0464	1499.69	56774.3
121.101	1511	1.80641e+06	(1R,5S)-1,8-Dimethyl-4-(propan-2-ylidene)spiro[4.5]dec-7-ene
207.174	1514.63	116644
161.132	1521	371763	1-Isopropyl-4,7-dimethyl-1,2,3,5,6,8a-hexahydronaphthalene
136.124	1525.93	155242
57.0694	1537.52	162449
69.0695	1539.86	26216.3
121.064	1582	18709.2	Bicyclo[6.3.0]undeca-1(8),9-diene, 11,11-dimethyl-
57.0695	1595.62	162459
57.0694	1596.29	608591
71.0851	1660.4	177318
119.085	1664.99	1.6938e+06
129.069	1683.75	8346.32
109.064	1686.96	58283.4
57.0695	1695.42	380872
57.0695	1700.38	50818.5
55.0537	1746.44	30548.4
219.137	1763	280226	3,5-di-tert-Butyl-4-hydroxybenzaldehyde
57.0694	1794.91	283439
61.0275	1822.87	49843.9
149.022	1865.06	386867
57.0695	1894.55	109824
74.0353	1923.95	26746
81.0688	1924.83	10736.3
67.0535	1958.27	13799.6
93.0686	1958.27	22498.4
149.022	1961.43	167727
93.0686	1981	129481	Bicyclo[9.3.1]pentadeca-3,7-dien-12-ol, 4,8,12,15,15-pentamethyl-, [1R-(1R*,3E,7E,11R*,12R*)]-
57.0695	1994.82	119187
63.9426	2016.22	105735
121.1	2019	16431.5	(S,E)-8,12,15,15-Tetramethyl-4-methylenebicyclo[9.3.1]pentadeca-7,11-diene
57.0695	2094.65	52391
57.0695	2194.34	68422
91.0552	2251	23893.6	1,3,6,10-Cyclotetradecatetraene, 3,7,11-trimethyl-14-(1-methylethyl)-, [S-(E,Z,E,E)]-

## Sheet: T. simmonsii exposed to B. cine
row m/z	RI	mean area	compound
83.9519	702	7.31316e+07
56.0616	803.8	204714
59.0487	805	94598.4	1,8-Nonanediol, 8-methyl-
48.9834	806.767	1.35635e+06
45.033	807.566	1.25748e+06
45.033	838.446	251190
59.0487	839.079	368952
48.9834	839.781	101207
59.0486	840.294	26298.6
91.0537	864.259	2.70408e+07
91.0549	891	6.84225e+06	Benzene, 1,3-dimethyl-
57.0694	943.528	369099
59.0486	959	381437	Propane, 1-ethoxy-
105.033	960	653102	Benzaldehyde
57.0328	988	154277	3-Octanone
81.0326	991.171	211865
121.075	1001.58	43688.9
56.0616	1003.61	84064.9
57.0694	1029.64	1.97756e+06
43.0174	1040.14	19916.2
71.0852	1073.14	52837.8
57.0695	1075.04	36227.1
56.0616	1103.35	311433
91.0551	1112	2.97368e+06	Phenylethyl Alcohol
123.079	1113.25	27269.9
79.0536	1138.18	120135
95.0851	1178	2.58918e+06	2-Methylisoborneol
57.0694	1198.02	209096
118.077	1227	155507	Naphthalene, 1,2,3,4-tetrahydro-1,4-dimethyl-
105.071	1239	3.19344e+07	6,7-Dimethyl-1,2,3,5,8,8a-hexahydronaphthalene
145.101	1245	1.61996e+06	Benzene, 1-(1-methylethenyl)-2-(1-methylethyl)-
105.071	1270	1.1582e+06	Benzene, 1-methyl-4-(3-methyl-3-butenyl)-
105.071	1275.15	30069.7
147.116	1275.25	31831.5
57.0694	1297.46	672730
57.0696	1297.86	138813
73.0467	1329.55	202815
145.101	1350.4	4.79591e+06
56.0617	1371	14189.8	Propanoic acid, 2-methyl-, 3-hydroxy-2,2,4-trimethylpentyl ester
71.0853	1373.89	15021.6
93.0689	1389	830349	1,5-Cyclodecadiene, 1,5-dimethyl-8-(1-methylethenyl)-, [S-(Z,E)]-
57.0694	1396.92	466850
57.0696	1397.07	60168.7
119.085	1416	442048	Benzene, 1-methyl-4-(1-methylpropyl)-
147.116	1418	585838	(-)-Aristolene
105.07	1416.51	294494
119.085	1421.99	846431
119.085	1433.07	861114
205.159	1468.89	11992.8
119.085	1474	435611	(1R,4R,5S)-1,8-Dimethyl-4-(prop-1-en-2-yl)spiro[4.5]dec-7-ene
145.101	1490.16	30450.1
189.164	1492.4	62365.1
57.0694	1496.5	123090
105.071	1497	259888	α-Muurolene
73.0467	1499.76	123994
121.101	1511	856372	(1R,5S)-1,8-Dimethyl-4-(propan-2-ylidene)spiro[4.5]dec-7-ene
161.132	1521	66481	1-Isopropyl-4,7-dimethyl-1,2,3,5,6,8a-hexahydronaphthalene
57.0694	1537.73	10287.4
69.0697	1540.11	33644.8
57.0695	1596.13	112604
119.085	1665.16	1.3123e+06
169.101	1668.62	7887.82
135.08	1687.23	18583.5
82.04	1687.41	13974
109.064	1687.46	15397.6
57.0695	1695.4	248232
93.0688	1924.62	12443.9
79.0537	2248.74	10156.6

## Sheet: T. simmonsii exposed to F. oxys
row m/z	RI	mean area	compound
48.9834	702	6.44587e+07
59.0487	805.115	1.03161e+06
59.0486	806.984	113394
48.9834	807.532	758615
45.033	808.011	2.10371e+06
48.9834	837.624	226166
45.0331	838.898	1.48895e+06
59.0488	840.123	82430.8
106.079	863.882	6.65383e+06
91.0562	864.464	2.12371e+07
56.0616	866.107	313580
91.056	891	1.32417e+07	Benzene, 1,3-dimethyl-
57.0697	907.805	757599
108.067	910.684	965798
57.0692	942.375	1.7302e+06
83.0485	957.681	13404.7
59.0487	959	285311	Propane, 1-ethoxy-
105.032	960	2.26771e+06	Benzaldehyde
57.0331	980.542	329989
57.0331	988	422300	3-Octanone
108.093	988.984	23855
43.0537	989.344	14252.9
81.033	990.852	495341
43.0174	1000.32	277856
122.072	1002.33	38352.9
56.0617	1002.94	156589
56.0615	1009.89	64128.4
122.072	1019.14	91994.9
67.0538	1027	48155.1	Cyclohexene, 1-methyl-4-(1-methylethenyl)-, (S)-
57.0696	1029.48	6.67948e+06
119.086	1057.1	13153.7
55.0538	1059.36	22918.4
57.0692	1061.9	123479
105.033	1065.43	273802
55.0538	1072.61	54554.8
71.0853	1073.44	23618.5
57.0697	1080.51	129124
119.086	1082.27	29148.3
123.043	1092.26	65927.3
105.033	1094.23	16124.3
57.0697	1098.12	582942
56.0617	1102.93	781908
57.0695	1103.42	28147.4
91.058	1112	3.55734e+07	Phenylethyl Alcohol
122.072	1113.09	67488.4
121.064	1113.14	154416
122.072	1113.19	88853.3
138.067	1148.55	68370.7
70.0774	1151.37	55488.2
73.0466	1160	346039	Cyclopentasiloxane, decamethyl-
81.0693	1170.56	15393.3
56.0617	1172.88	17077.8
57.0697	1197.65	670679
55.0538	1206	124626	Decanal
133.101	1206.16	11413.6
135.013	1220.37	338373
55.0538	1228.77	358364
104.061	1257.12	132626
104.061	1259.26	32114.5
149.029	1290.37	166670
55.0538	1290.44	36331
58.0408	1292.4	70859.8
58.0408	1294.7	53841.3
57.0696	1297.24	2.2371e+06
57.0698	1314.91	245973
43.0174	1318.82	93368.9
81.0693	1319.12	67696.5
43.0175	1322.2	14368
151.075	1323.79	441086
57.0698	1324.94	92915.5
151.075	1325.43	30812.2
83.0852	1338.32	164184
69.0697	1341.44	40640
178.171	1346.37	70371
57.0697	1348.25	401199
133.101	1349.47	765057	Tricyclo[7.2.0.0(3,8)]undec-4-ene, 4,8,11,11-tetramethyl-
57.0698	1351.24	318159
149.095	1353	174377	Phenol, 2-(1,1-dimethylethyl)-4-methyl-
161.132	1354.83	148953
57.0698	1356.05	1.08304e+06
57.0697	1362.87	646249
133.101	1370.17	1.51223e+06
71.0853	1373.74	18719.2
57.0697	1374.03	314561
133.101	1374.07	285265
97.101	1387.98	248913
93.0693	1389	1.10342e+06	1,5-Cyclodecadiene, 1,5-dimethyl-8-(1-methylethenyl)-, [S-(Z,E)]-
133.101	1390.68	81485.7
133.101	1390.8	50806.1
57.0692	1396.84	93424.2
57.0696	1396.98	3.62183e+06
119.086	1408.88	9.99718e+06
133.101	1411	2.64814e+06	4a,8-Dimethyl-2-(prop-1-en-2-yl)-1,2,3,4,4a,5,6,7-octahydronaphthalene
105.069	1416.69	1.4554e+06
161.132	1416.87	326037
161.132	1418	2.55092e+06	1H-3a,7-Methanoazulene, octahydro-3,8,8-trimethyl-6-methylene-, [3R-(3α,3aβ,7β,8aα)]-
119.087	1422.31	545825
162.037	1430.75	304892
93.0695	1435.27	2.31683e+07
133.1	1439.3	736133
158.096	1441.02	939757
83.0852	1442.54	216393
93.0697	1450.98	395723
57.0698	1460.3	755779
119.086	1461.74	7.32013e+06
81.0692	1463.73	117132
177.128	1463.85	147434
93.0695	1466	1.57598e+06	Bicyclo[7.2.0]undec-4-ene, 4,11,11-trimethyl-8-methylene-,[1R-(1R*,4Z,9S*)]-
165.09	1469.29	384006
165.09	1469.29	26222.6
119.086	1474	524599	(1R,4R,5S)-1,8-Dimethyl-4-(prop-1-en-2-yl)spiro[4.5]dec-7-ene
161.096	1476.53	67546.4
57.0698	1478.97	188749
161.132	1479.29	88379.9
132.093	1481	424514	Benzene, 1-(1,5-dimethyl-4-hexenyl)-4-methyl-
97.101	1490.76	120268
119.086	1493	110851	1H-3a,7-Methanoazulene, 2,3,4,7,8,8a-hexahydro-3,6,8,8-tetramethyl-, [3R-(3α,3aβ,7β,8aα)]-
57.0697	1496.25	1.53565e+06
57.0698	1500.34	115822
107.085	1505.6	250509
121.065	1506.77	4.21265e+06
121.101	1511	2.78196e+06	(1R,5S)-1,8-Dimethyl-4-(propan-2-ylidene)spiro[4.5]dec-7-ene
149.029	1518.29	186319
72.0502	1518.86	154788
93.0695	1520.28	543135
149.132	1528.96	1.37721e+06
205.158	1531.97	149875
57.0698	1543.09	169026
83.0852	1546.41	99882.8
85.1011	1549	24306.5
69.0695	1559	852705	1H-Cycloprop[e]azulen-4-ol, decahydro-1,1,4,7-tetramethyl-, [1aR-(1aα,4β,4aβ,7α,7aβ,7bα)]-
69.0696	1561.73	389803
57.0698	1567.21	152079
69.0694	1567.76	44618.1
105.033	1569.42	17414.7
149.029	1594.64	97846.7
57.0697	1596.68	530709
57.0698	1599	13755.7	(3R,3aS,6S,7R)-3,6,8,8-Tetramethyloctahydro-1H-3a,7-methanoazulen-6-ol
93.0695	1612.77	2.48503e+07
119.087	1628.42	4.12477e+07	β-Acorenol
173.095	1632.19	11188.3
161.132	1632.54	10964
57.0698	1660.85	115664
119.086	1665.18	1.80611e+06
151.111	1665.4	944346
93.0695	1681.04	370836
135.08	1687.34	93044.5
109.064	1687.37	15061.2
57.0698	1695.31	166144
161.132	1702	90543.9	Guaiol
219.138	1763	2.46708e+06	3,5-di-tert-Butyl-4-hydroxybenzaldehyde
57.0697	1795.15	151111
61.028	1822.7	183892
105.069	1850.46	644378
123.116	1853.57	16669.5
149.029	1865.86	156779
134.108	1867.34	76184
211.148	1878.15	26922.6
161.132	1881.06	369947
186.14	1900.98	30635.8
229.195	1903.27	22395.5
119.087	1924.08	989889
161.132	1942.82	673791
149.022	1960.52	232168
121.101	1964.83	1.25628e+06
159.116	1977.19	19997.2
93.0695	1981	167508	Bicyclo[9.3.1]pentadeca-3,7-dien-12-ol, 4,8,12,15,15-pentamethyl-, [1R-(1R*,3E,7E,11R*,12R*)]-
71.0852	1995.96	15792.9
107.085	1999.79	24794.6
107.085	1999.9	50006.1
121.101	2019	503684	(S,E)-8,12,15,15-Tetramethyl-4-methylenebicyclo[9.3.1]pentadeca-7,11-diene
93.0695	2089.97	34085
135.08	2188.94	718206
91.058	2251	353444	1,3,6,10-Cyclotetradecatetraene, 3,7,11-trimethyl-14-(1-methylethyl)-, [S-(E,Z,E,E)]-

## Sheet: F. oxysporum exposed to T. simm
row m/z	RI	mean area	compound
83.952	702	5.87404e+07
56.0615	803.732	287001
59.0488	805	183855	1,8-Nonanediol, 8-methyl-
48.9832	805.478	954999
45.033	807.703	1.01556e+06
48.9832	836.323	40151.9
45.0328	837.658	3.18773e+06
59.0487	839.319	278683
59.0488	840.329	42190.5
106.079	863.974	2.63226e+07
91.055	865.08	3.42612e+07
104.061	889.045	1.47654e+06
56.0616	889.901	10044.1
91.0551	891	2.94415e+07	Benzene, 1,3-dimethyl-
70.0775	903.57	67394.3
57.0694	907.93	3.10869e+06
108.067	910.49	285778
93.0694	931.11	32960
57.0693	933.573	17008.8
57.0694	942.942	3.04548e+06
55.0539	943.122	9830.11
57.0697	944.201	56954.4
83.0487	957.819	51732.7
59.0487	958.926	16942.4
105.033	960	3.07284e+06	Benzaldehyde
106.04	979.062	368526
57.0328	980.1	265713
94.0406	985.635	443799
94.0406	988	242215	3-Octanone
57.0693	987.849	107042
43.054	988.057	60787.8
105.069	990.617	243382
69.0696	990.645	9898.32
81.0328	991.06	1.22297e+06
57.0693	998.616	306986
43.0175	999.806	844722
43.0175	1001.27	244425
121.064	1001.65	18576.4
122.067	1002.97	30434.5
56.0615	1003.01	355169
281.05	1004	109602	Cyclotetrasiloxane, octamethyl-
43.0175	1004.45	14285
93.0694	1006.57	39211.1
56.0615	1015.5	211503
122.07	1019.33	237575
67.0537	1027	279878	Cyclohexene, 1-methyl-4-(1-methylethenyl)-, (S)-
57.0694	1029.26	1.09821e+07
79.0538	1034.31	561121
119.087	1057.07	34706.8
55.0537	1058.69	25685.5
108.056	1059.66	43484.2
105.033	1065.08	367976
59.0488	1072.11	92663.2
108.056	1078.15	400500
135.08	1078.55	208482
57.0695	1080.63	295290
119.087	1082.42	116222
58.0407	1091.76	163295
123.043	1092.58	63468.3
71.0116	1094.02	43721.1
105.033	1095.52	10104
57.0694	1097.98	1.07889e+06
56.0615	1103.08	1.32155e+06
91.0538	1112	6.71325e+06	Phenylethyl Alcohol
121.064	1111	4.44227e+06	Benzene, 1-ethyl-4-methoxy-
121.064	1113.25	184451
70.0772	1151.35	111737
107.048	1152.43	57869.2
92.0567	1155.85	9204.51
73.0524	1160	447725	Cyclopentasiloxane, decamethyl-
57.0696	1197.79	1.81956e+06
55.0537	1206	246954	Decanal
133.101	1206.23	42627.5
57.0695	1211.91	307197
135.013	1219.74	457192
55.0538	1229	690263
55.0537	1252.82	86952.3
104.062	1256.88	181168
57.0695	1261.74	148529
69.0696	1273.01	27982.4
95.0852	1274.76	53988.9
97.1007	1285.09	147834
142.077	1288.97	66507.6
149.023	1289.95	284030
58.0407	1293.2	163777
57.0695	1297.35	3.35584e+06
69.0696	1309.99	302580
57.0695	1315.1	335833
81.0694	1319.36	217523
97.0643	1322.61	13977.2
57.0695	1324.91	183102
73.0524	1329.88	474851
83.0849	1338.47	226258
69.0696	1341.62	52925.3
178.171	1346.41	121689
163.146	1347.56	12296.6
57.0695	1348.31	513428
43.0537	1349	24827.1	2,2,4-Trimethyl-1,3-pentanediol diisobutyrate
133.101	1350	923983	Tricyclo[7.2.0.0(3,8)]undec-4-ene, 4,8,11,11-tetramethyl-
97.1007	1349.96	48450.3
149.096	1353	1.12202e+06	Phenol, 2-(1,1-dimethylethyl)-4-methyl-
161.132	1354.93	368784
57.0695	1356.01	484228
69.0696	1359.77	36066.9
105.069	1360.04	252700
57.0695	1361.24	958092
109.1	1363.11	88247.5
57.0695	1368.21	867337
133.101	1370.27	2.29537e+06
133.101	1374.04	19004.9
57.0695	1374.19	782259
133.101	1376.17	182901
97.1007	1387.75	360981
148.124	1388.34	247450
93.0695	1389.35	608636
57.0695	1389.63	57851.8
133.101	1390.19	535113
97.1007	1391.7	105532
57.0695	1395.87	66467.2
57.0695	1397.09	4.34733e+06
119.087	1409.15	2.84226e+07
160.112	1412.08	860598
93.0696	1412.2	861186
147.116	1416.85	1.4634e+06
161.132	1418	9.59957e+06	1H-3a,7-Methanoazulene, octahydro-3,8,8-trimethyl-6-methylene-, [3R-(3α,3aβ,7β,8aα)]-
162.037	1430.27	531690
107.085	1435.25	3.0016e+06
93.0695	1435.56	2.47123e+07
158.096	1440.94	1.14478e+06
83.0849	1442.5	229434
93.0694	1451.26	537381
69.0695	1454.88	1.28852e+06
57.0695	1454.94	697819
57.0695	1460.26	825876
119.087	1462	2.48568e+07
161.132	1462.06	122922
177.127	1464.05	164870
119.086	1464.13	89967.8
93.0694	1466	501362	Bicyclo[7.2.0]undec-4-ene, 4,11,11-trimethyl-8-methylene-,[1R-(1R*,4Z,9S*)]-
57.0695	1467.37	386632
165.09	1469.52	436636
119.087	1472.29	318997
69.0695	1474	288999	(1R,4aR,8aR)-2,5,5,8a-Tetramethyl-4,5,6,7,8,8a-hexahydro-1H-1,4a-methanonaphthalene, rel-
161.095	1476.93	48839.9
161.132	1479.49	69174.8
132.093	1481	1.88263e+06	Benzene, 1-(1,5-dimethyl-4-hexenyl)-4-methyl-
167.085	1486.93	86867
97.1008	1490.92	166745
119.087	1493	1.01161e+06	1H-3a,7-Methanoazulene, 2,3,4,7,8,8a-hexahydro-3,6,8,8-tetramethyl-, [3R-(3α,3aβ,7β,8aα)]-
57.0695	1496.39	1.77569e+06
73.0524	1500.07	240170
132.093	1503.36	35021.9
107.085	1505.57	176061
93.0695	1505.72	273267
121.064	1507.27	1.10567e+07
121.101	1511	7.36515e+06	(1R,5S)-1,8-Dimethyl-4-(propan-2-ylidene)spiro[4.5]dec-7-ene
149.023	1518.25	286142
91.0535	1518.8	28365.7
93.0694	1521.18	68330.1
69.0696	1521	622685	(3R,3aR,7R,8aS)-3,8,8-Trimethyl-6-methyleneoctahydro-1H-3a,7-methanoazulene
136.124	1526.07	12961.4
149.131	1529.21	1.02708e+06
159.116	1530.58	41341.9
205.158	1532.02	226372
83.0849	1546.36	126378
85.1009	1548.96	26601.2
69.0695	1559	154621	1H-Cycloprop[e]azulen-4-ol, decahydro-1,1,4,7-tetramethyl-, [1aR-(1aα,4β,4aβ,7α,7aβ,7bα)]-
69.0694	1562.27	54695.7
57.0695	1567.16	194711
149.023	1593.87	411563
57.0695	1597	879054
95.085	1599	123412	(3R,3aS,6S,7R)-3,6,8,8-Tetramethyloctahydro-1H-3a,7-methanoazulen-6-ol
93.0695	1612.68	2.94766e+07
119.087	1629	7.41568e+07	β-Acorenol
57.0695	1645.18	176298
71.0852	1661.07	41238.1
57.0695	1661.07	99714.1
165.126	1662.44	321025
119.087	1665.49	1.68717e+06
73.0524	1669.85	175960
109.064	1687.56	43287.4
135.083	1687.57	59836.1
108.092	1690.4	20802.5
57.0695	1695.56	267761
161.132	1702	550449	Guaiol
219.138	1763	2.12847e+06	3,5-di-tert-Butyl-4-hydroxybenzaldehyde
57.0695	1795.32	326526
61.0243	1822.93	219924
73.0465	1830.13	90352.2
105.069	1850.7	741134
123.116	1853.75	44617.1
134.108	1867.44	62427.9
211.148	1878.49	10341.3
161.132	1881.17	468124
57.0694	1895.19	219718
236.127	1897.77	10888.5
186.14	1900.78	103747
229.195	1903.37	59708.1
105.069	1904.04	88157.3
159.117	1924.16	326098
119.087	1924.2	1.12351e+06
161.132	1942.92	772662
93.0695	1958.71	73166.3
149.022	1960.32	391860
121.101	1965	1.4734e+06
93.0695	1981	252202	Bicyclo[9.3.1]pentadeca-3,7-dien-12-ol, 4,8,12,15,15-pentamethyl-, [1R-(1R*,3E,7E,11R*,12R*)]-
57.0695	1995.14	254908
121.101	1998.91	71129.1
121.101	1999.95	385336
107.085	1999.97	107777
121.101	2019	127340	(S,E)-8,12,15,15-Tetramethyl-4-methylenebicyclo[9.3.1]pentadeca-7,11-diene
286.229	2089.95	103725
93.0695	2090	14578.8	(4aR,4bR,10aR)-7-Isopropyl-1,1,4a-trimethyl-3,4,4a,4b,5,6,10,10a-octahydrophenanthren-2(1H)-one
57.0694	2094.89	218515
148.088	2120.76	27052.3
74.0355	2124.55	6985.03
135.083	2189.21	2.71932e+06
57.0694	2194.46	138890
93.0694	2248.97	85946.1	1,3,6,10-Cyclotetradecatetraene, 3,7,11-trimethyl-14-(1-methylethyl)-, [S-(E,Z,E,E)]-

## Sheet: T. simmonsii unexposed
row m/z	RI	mean area	compound
48.9841	702	7.0866e+07
59.0494	805.464	517108
59.0494	807.788	77818.9
165.872	807.931	109539
48.9842	808.079	70192.2
165.872	808.079	27997.8
95.013	831	4.88174e+06	Furfural
45.0337	842	765312	2-Propanol, 1-propoxy-
59.0494	841.842	427498	Ethanol, 2-(1-methylethoxy)-
98.0364	854.065	289131
91.0548	857	3.57025e+06	Ethylbenzene
91.0547	891	510799	Benzene, 1,3-dimethyl-
108.069	911.818	269535
93.0704	931.525	29149.3
58.0414	942.126	15683
57.0701	943.897	1.50279e+06
105.034	960	4.63906e+06	Benzaldehyde
43.0543	988	34137	3-Octanone
56.0622	1004.34	70952.1
57.0701	1030.5	3.16625e+06
43.0182	1041.02	20347.6
105.034	1067.49	49340
57.0701	1070.29	141761
57.0704	1070.29	22717.9
105.034	1071.36	78852.4
72.0448	1072.76	10247
57.0701	1098.62	1.48713e+07
56.0625	1104.03	511133
43.0183	1111.54	67140
91.0547	1112	3.38208e+06	Phenylethyl Alcohol
91.0547	1113.71	174616
43.0181	1113.72	118698
55.0545	1190.64	65144.2
120.021	1195.94	16550.7
57.0701	1198.52	412172
55.0546	1206	234015	Decanal
55.0545	1229.65	443775
57.0704	1298.11	859522
43.0181	1319.75	139907
71.0496	1349	1.37749e+06	2,2,4-Trimethyl-1,3-pentanediol diisobutyrate
145.102	1351.88	16397.8
71.0496	1371	1.89223e+06	Propanoic acid, 2-methyl-, 3-hydroxy-2,2,4-trimethylpentyl ester
55.0546	1390	138626	2-Decyn-1-ol
57.0701	1397.58	734824
112.089	1398.87	238539
147.118	1418	1.5583e+06	(-)-Aristolene
161.134	1418	663930	1H-3a,7-Methanoazulene, octahydro-3,8,8-trimethyl-6-methylene-, [3R-(3α,3aβ,7β,8aα)]-
119.087	1434	720623	cis-α-Bergamotene
123.081	1437.58	8243.44
95.0138	1457.82	1.49226e+06
177.129	1464.93	113437
165.092	1469.81	78032.6
57.0701	1470.13	18158.1
119.087	1474	791419	(1R,4R,5S)-1,8-Dimethyl-4-(prop-1-en-2-yl)spiro[4.5]dec-7-ene
57.0701	1497.16	111669
73.0653	1500.98	21492.2
93.0706	1507.36	17093.3
121.102	1511	1.94222e+06	(1R,5S)-1,8-Dimethyl-4-(propan-2-ylidene)spiro[4.5]dec-7-ene
72.0448	1520.84	49681.4
55.0546	1590	81893	9-Octadecene, (E)-
57.0701	1597.02	733093
71.0862	1661.52	49007.7
119.087	1666.27	1.15344e+06
151.113	1666.32	2.50981e+06
135.082	1688.35	25490.5
82.0418	1688.35	16168.9
57.0701	1696.39	643021
105.071	1699.43	68505.1
119.087	1758.97	36573.5
219.141	1763	574892	3,5-di-tert-Butyl-4-hydroxybenzaldehyde
57.0704	1796.04	860568
61.0288	1823.77	164382
179.109	1854.96	434989
149.024	1866.45	496919
57.0701	1896.07	466269
58.0414	1899.65	7337.13
91.0546	1931.31	16113
93.0706	1959.9	80101.4
149.024	1959.91	255306
93.0706	1981	219943	Bicyclo[9.3.1]pentadeca-3,7-dien-12-ol, 4,8,12,15,15-pentamethyl-, [1R-(1R*,3E,7E,11R*,12R*)]-
73.0652	1984.88	43856.5
88.0525	1992.22	71722.3
57.0701	1996.11	660362
121.102	2019	156891	(S,E)-8,12,15,15-Tetramethyl-4-methylenebicyclo[9.3.1]pentadeca-7,11-diene
61.0288	2023	46615.1	n-Hexadecanoic acid
57.0701	2096	328702	Nonane, 3-methyl-5-propyl-
57.0701	2195.69	673882
91.0547	2250.4	208602
79.0549	2251	52497.9	1,3,6,10-Cyclotetradecatetraene, 3,7,11-trimethyl-14-(1-methylethyl)-, [S-(E,Z,E,E)]-
