# Supplementary material for: A new system to study directional volatile-mediated interactions reveals the ability of fungi to specifically react to other fungal volatiles
Source: Frontiers journal article supplement (doi:10.3389/fevo.2023.1128514), 2023-04-06
Supplement: Table_2.XLSX [file Table_2.XLSX]

## Sheet: Table S1
	compound	CAS #	RI	match factor	B. cinerea emitter (2M)	B. cinerea emitter (1M)	F. oxysporum emitter (2M)	F. oxysporum emitter (1M)
	Ethylbenzene	100-41-4	856.83	934	x
	Cyclotetrasiloxane, octamethyl-	556-67-2	1004.3	881	x	x
	Cyclohexene, 1-methyl-4-(1-methylethenyl)-, (S)-	5989-54-8	1026.97	884	x
	Benzene, 1-ethyl-4-methoxy-	1515-95-3	1110.96	901			x	x
	Undecane, 2,6-dimethyl	17301-23-4	1116.77	850	x	x
	Cyclopentasiloxane, decamethyl-	541-02-6	1160.3	906	x	x
	2-Methylisoborneol	2371-42-8	1177.72	864	x
	Benzene, 1-methyl-4-(3-methyl-3-butenyl)-	56818-01-0	1270.32	858	x	x
	Tricyclo[7.2.0.0(3,8)]undec-4-ene, 4,8,11,11-tetramethyl-	unknown(1)	1349.66	801			x	x
	1,5,6,7-Tetramethylbicyclo[3.2.0]hepta-2,6-diene	134329-43-4	1390.23	736			x
	Bicyclo[6.3.0]undeca-1(8),9-diene, 11,11-dimethyl-	unknown(2)	1581.62	791	x	x
	(3R,3aS,6S,7R)-3,6,8,8-Tetramethyloctahydro-1H-3a,7-methanoazulen-6-ol	19903-73-2	1599.49	863			x
	(4aR,4bR,10aR)-7-Isopropyl-1,1,4a-trimethyl-3,4,4a,4b,5,6,10,10a-octahydrophenanthren-2(1H)-one	29461-25-4	2089.62	717			x
